# Supplementary material for: Manipulation of oxygen evolution reaction kinetics of a free-standing CoSe2–NiSe2heterostructured electrode by interfacial engineering
Source: Royal Society of Chemistry journal article supplement (doi:10.1039/d2se01259f), 2022-01-01
Supplement: d2se01259f1.pdf [file d2se01259f1.pdf]

## Supplementary Information

### **Manipulation of oxygen evolution reaction kinetic of free-standing CoSe<sub>2</sub>-NiSe<sub>2</sub> heterostructure electrode by interfacial Engineering**

Muhammad Rauf, <sup>a,1</sup> Yang Ling, <sup>a,1</sup> Jingwen Wang, <sup>c</sup> Hongwei Mi, <sup>a</sup> Qianling Zhang, <sup>a</sup> Peixin Zhang, <sup>a</sup> Xiangzhong Ren, <sup>a</sup> Yongliang Li <sup>a,b\*</sup>

<sup>a</sup> College of Chemistry and Environmental Engineering, Shenzhen University, Shenzhen, Guangdong 518060, China.

<sup>b</sup> Guangdong Flexible Wearable Energy and Tools Engineering Technology Research Centre, Shenzhen University, Shenzhen 518060, China.

<sup>c</sup> Environmental Science and Engineering Research Center, Harbin Institute of Technology (Shenzhen), Shenzhen 518060, China.

Corresponding author:

Yongliang Li, Tel: +86-755-26931162, Email: liyli@szu.edu.cn

<sup>1</sup> These authors contributed equally.

## 1. EDX analysis

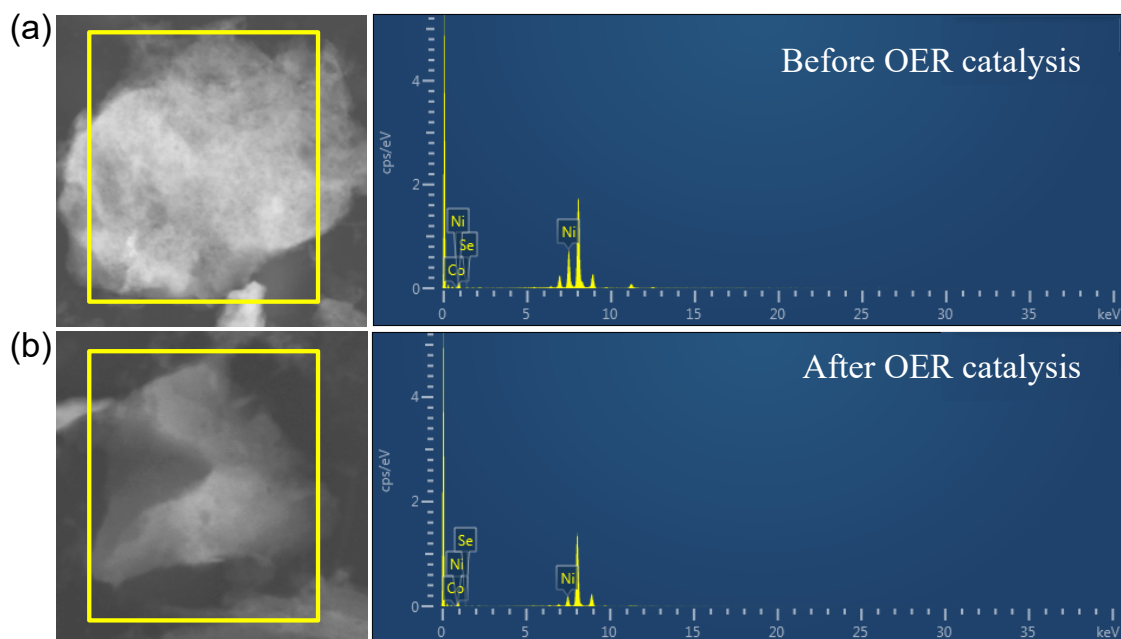

**Fig. S1** EDX analysis of  $\text{CoSe}_2\text{-NiSe}_2/\text{NF}$  electrocatalyst before and after the OER catalysis in an alkaline solution.

Energy dispersive spectroscopy (EDS) has been used for component analysis to acquire spectral data and map elemental distributions within the sample. The EDS spectra revealed the presence of Ni, Co, and Se elements in the heterostructured  $\text{CoSe}_2\text{-NiSe}_2/\text{NF}$  electrocatalyst before (Fig. S1a) and after (Fig. S1b) OER catalysis. However, the relative wt. % of the Co (22%), Ni (63%), and Se (15%) elements were changed to 10%, 81%, and 9%, respectively, after OER catalysis due to the oxidation process.

## 2. SAED pattern

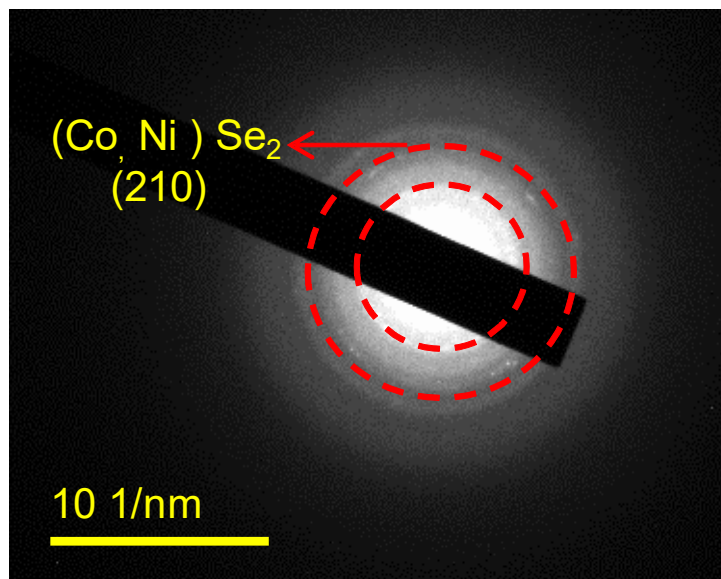

Fig. S2 SAED pattern of CoSe<sub>2</sub>-NiSe<sub>2</sub>/NF electrocatalyst.

## 3. Morphology analysis after OER catalysis

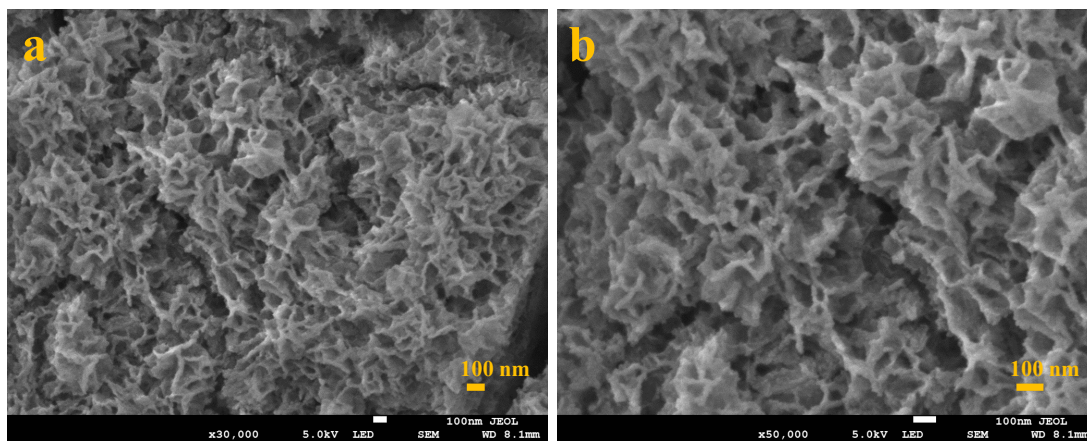

Fig. S3 FE-SEM images of CoSe<sub>2</sub>-NiSe<sub>2</sub>/NF electrocatalyst after the OER catalysis.

**Table S1. Comparison of the OER catalytic activity of CoSe<sub>2</sub>-NiSe<sub>2</sub>/NF electrocatalyst with reported transition metal selenide-based electrocatalysts.**

| Electrocatalyst                                                             | OER( $\eta$ (mV) $j=10$ mA cm <sup>-2</sup> ) | Tafel slope<br>(mV dec <sup>-1</sup> ) | Reference        |
|-----------------------------------------------------------------------------|-----------------------------------------------|----------------------------------------|------------------|
| CoSe <sub>2</sub> @NiSe <sub>2</sub>                                        | 235 <sub>(<math>\eta=20</math>)</sub>         | 43.2                                   | [1]              |
| CoO <sub>x</sub> -CoSe                                                      | 298 <sub>(<math>\eta=20</math>)</sub>         | 68                                     | [2]              |
| NiSe <sub>2</sub> /NF                                                       | 274 <sub>(<math>\eta=20</math>)</sub>         | 97                                     | [3]              |
| CoSe <sub>2</sub> /Ni <sub>3</sub> Se <sub>4</sub> @NC/KB                   | 260                                           | 68                                     | [4]              |
| CoSe <sub>2</sub> /FeSe <sub>2</sub> @C                                     | 291                                           | 62                                     | [5]              |
| Ni <sub>0.26</sub> Co <sub>0.74</sub> Se                                    | 302 <sub>(<math>\eta=50</math>)</sub>         | 110                                    | [6]              |
| CoSe <sub>2</sub> -CoO/NCF                                                  | 279                                           | 44.6                                   | [7]              |
| EG/(Co, Ni)Se <sub>2</sub> -NC                                              | 258                                           | 73.3                                   | [8]              |
| Cu <sub>3</sub> Se <sub>2</sub> @CoSe <sub>2</sub> -NiSe <sub>2</sub> /PNCF | 240                                           | 87                                     | [9]              |
| CoSe <sub>2</sub> -NiSe <sub>2</sub> /NF                                    | 160                                           | 44                                     | <b>This work</b> |

### References:

- [1] X. Zhang, Y. Ding, G. Wu, X. Du, CoSe<sub>2</sub>@NiSe<sub>2</sub> nanoarray as better and efficient electrocatalyst for overall water splitting, *International Journal of Hydrogen Energy*, 45 (2020) 30611-30621.
- [2] X. Xu, P. Du, Z. Chen, M. Huang, An electrodeposited cobalt-selenide-based film as an efficient bifunctional electrocatalyst for full water splitting, *Journal of Materials Chemistry A*, 4 (2016) 10933-10939.
- [3] J. Zhu, Y. Ni, Phase-controlled synthesis and the phase-dependent HER and OER performances of nickel selenide nanosheets prepared by an electrochemical deposition route, *Crystengcomm*, 20 (2018) 3344-3352.
- [4] G. Liu, Z. Zhang, J. Li, J. Liu, X. Long, H. Chen, H. Tong, Z. Liu, D. Qian,

Constructing heterostructured  $\text{CoSe}_2/\text{Ni}_3\text{Se}_4@\text{N}$ -doped carbon nanosheets/ketjen black carbon as a robust oxygen evolution electrocatalyst, *International Journal of Hydrogen Energy*, 45 (2020) 30666-30672.

[5] W. Li, Y. Niu, X. Wu, F. Wu, T. Li, W. Hu, Heterostructured  $\text{CoSe}_2/\text{FeSe}_2$  nanoparticles with abundant vacancies and strong electronic coupling supported on carbon nanorods for oxygen evolution electrocatalysis, *ACS Sustainable Chemistry & Engineering*, 8 (2020) 4658-4666.

[6] J. Zhu, Z. Liu, M. Zhai, Y. Ni,  $\text{Ni}_{1-x}\text{Co}_x\text{Se}$  nanostructures deposited on nickel foam by a facile potentiostatic route for enhanced OER performance, *Journal of Physics and Chemistry of Solids*, 148 (2021) 109658.

[7] T. Zhang, J. Yu, H. Guo, J. Liu, Q. Liu, D. Song, R. Chen, R. Li, P. Liu, J. Wang, Heterogeneous  $\text{CoSe}_2\text{-CoO}$  nanoparticles immobilized into N-doped carbon fibers for efficient overall water splitting, *Electrochimica Acta*, 356 (2020) 136822.

[8] J. Cao, K. Wang, J. Chen, C. Lei, B. Yang, Z. Li, L. Lei, Y. Hou, K. Ostrikov, Nitrogen-doped carbon-encased bimetallic selenide for high-performance water electrolysis, *Nano-Micro Letters*, 11 (2019) 67.

[9] G. Wang, J. Huang, G. Chen, W. Chen, C. Song, M. Li, X. Wang, D. Chen, H. Zhu, X. Zhang, K.K. Ostrikov, In-situ-engineered 3D  $\text{Cu}_3\text{Se}_2@\text{CoSe}_2\text{-NiSe}_2$  nanostructures for highly efficient electrocatalytic water splitting, *ACS Sustainable Chemistry & Engineering*, 8 (2020) 17215-17224.
